# Supplementary material for: The deep sea is a major sink for microplastic debris
Source: PubMed Central journal article supplement (PMC4448771; doi:10.1098/rsos.140317), 2014-12-17

Figure S1. Example of microplastic fibre detected in deep-sea sediment.

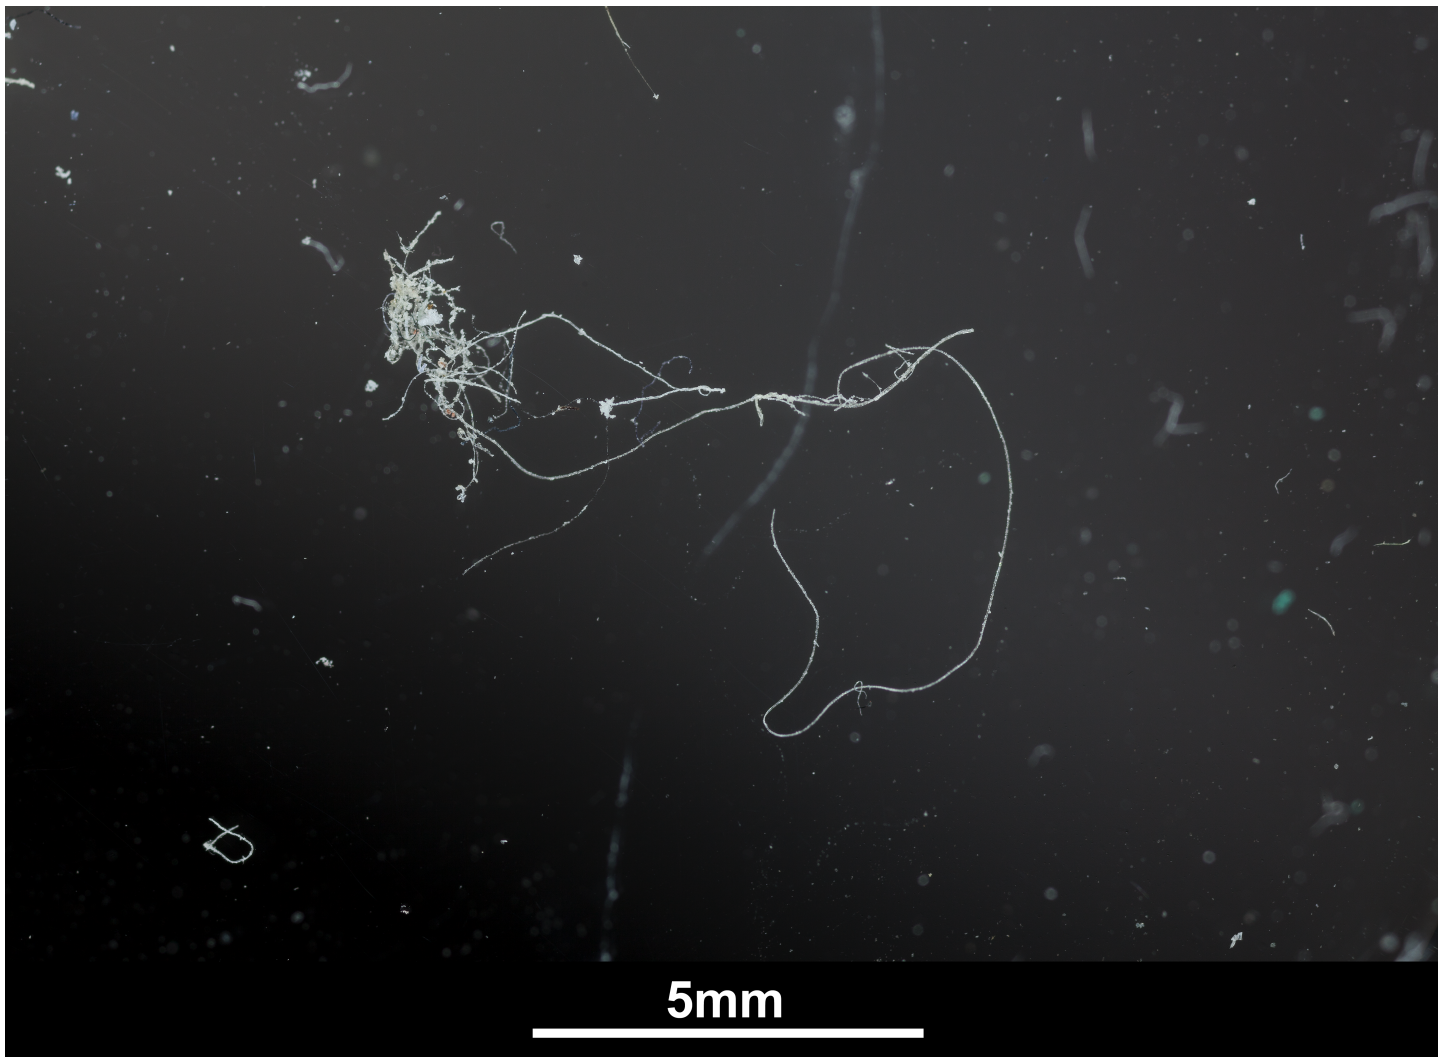

Supplement: rsos140317supp2.pdf [file rsos140317supp2.pdf]
