# Supplementary material for: The deep sea is a major sink for microplastic debris
Source: PubMed Central journal article supplement (PMC4448771; doi:10.1098/rsos.140317), 2014-12-17

Figure S2. The quantity and type of plastic and rayon fibres found in 50 ml of sediment (a) by sample, (b) total proportion of each microfibre type.

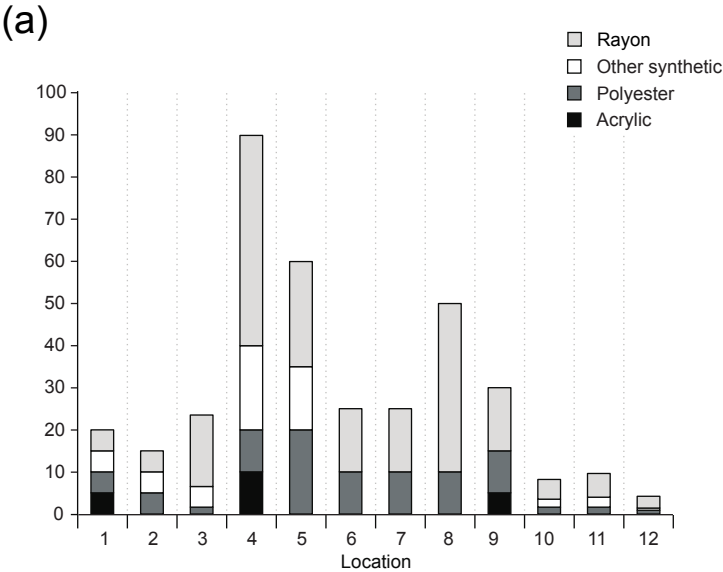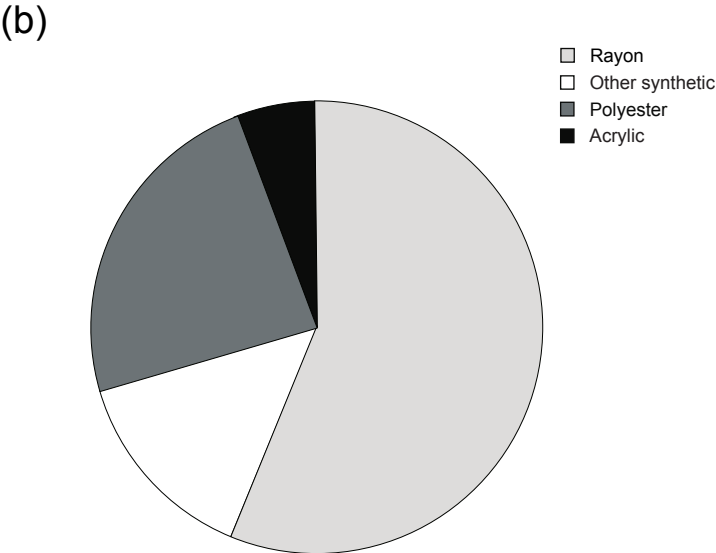

Supplement: rsos140317supp3.pdf [file rsos140317supp3.pdf]
